# Supplementary material for: Titanium and zirconium complexes supported by dipyrrolide ligandsElectronic supplementary information (ESI) available: Full experimental, NMR and analytical data. See http://www.rsc.org/suppdata/cc/b2/b208751k/
Source: Royal Society of Chemistry journal article supplement (doi:10.1039/b208751k), 2002-10-25
Supplement: b208751k.doc [file b208751k.doc]

# Supplementary Material

***Experimental Details***.

All reactions were carried out using standard Schlenk techniques under an atmosphere of nitrogen or in a nitrogen filled glove-box. Solvents were dried (Et2O and hexane - sodium benzophenone ketyl; toluene - Na, THF - activated alumina, dichloromethane, - CaH2), distilled and stored over 4 Å molecular sieves. Deuteriated benzene and toluene were vacuum distilled from K and deuteriated dichloromethane from CaH2. The compounds Me2C(C4H4N)2 (**L1**),1Ph2C(C4H4N)2 (**L2**),2 Zr(CH2Ph)4,3 Zr(NEt2)4,4 and Ti(CH2SiMe3)4,5 were synthesised according to literature procedures and chlorotrimethylsilane was distilled from magnesium before use; all other reagents were used as purchased. The 1H and 13C{1H} NMR spectra were recorded on a Bruker DPX-300 spectrometer operating at 300.13 and 75.47 MHz respectively; residual protio-solvent served as an internal reference. Elemental analyses were carried out by Mr. Stephen Boyer at the London Metropolitan University.

1B. J. Littler, M. A. Miller, C.-H. Hung, R. W. Wagner, D. F. O'Shea, P. D. Boyle, and J. S. Lindsey, *J. Org. Chem.*, 1999, **64**, 1391.

2T. Dubé, S. Conoci, S. Gambarotta, and G. P. A. Yap, *Organometallics*, 2000, **19**, 1182; B. Turner, M. Botoshansky, and Y. Eichen, *Angew. Chem. Int. Ed.*, 1998, **37**, 2475.

3U. Zucchini, E. Albizzati, and U. Giannini, *J. Organomet. Chem.*, 1971, **26**, 357.

4G. M. Diamond, R. F. Jordan, and J. L. Petersen, *Organometallics*, 1996, **15**, 4030; D. Steinborn, I. Wagner, and R. Taube, *Synthesis*, 1989, 304.

5M. R. Collier, M. F. Lappert, and R. Pearce, *J.Chem. Soc. Dalton Trans.*, 1973, 445.

***Synthesis of {Zr(CH2Ph)3}2[L1] (1)***

1. The reaction between the dipyrromethane **L1** (10 mg, 0.06 mmol) and Zr(CH2Ph)4 (25 mg, 0.12 mmol) was monitored by 1H NMR spectroscopy. The reaction was slow at room temperature, so was warmed to 50 ºC upon which toluene was eliminated and **1** was formed in quantitative yield after 2.5 h. Prolonged reaction times or heating above 50 ºC caused **1** to decompose to unidentified products.

2. A solution of **L1** (0.10 g, 0.55 mmol) in toluene (10 mL) was added to a stirred solution of Zr(CH2Ph)4 (0.50 g, 1.10 mmol) in toluene (10 mL) at room temperature. The resultant red mixture was stirred at 50 ºC for 2.5 h, filtered to remove a small quantity of brown solids and evaporated to dryness under vacuum. The oily solids were dissolved in Et2O (5 mL) and cooled to –30 ºC, yielding 0.07 g, 14 % of **1** as red blocks. Crystals of **1** suitable for X-ray diffraction studies were grown from a dilute hexane solution.

Analysis. No satisfactory analyses were obtained due to the propensity of **1** to decompose in the solid state under vacuum and at temperatures greater than room temperature under inert gas.

1H NMR (C6D6): δH 0.89 (s, 6 H, CH3), 2.96 (AB d, 6 H, *J* = 10.9 Hz, CH2Ph), 3.18 (AB d, 6 H, *J* = 10.9 Hz, CH2Ph), 5.53 (m, 2 H, pyrrole H), 5.98 (m, 2 H, pyrrole), 6.93-7.03 (m’s, 15 H, aryl H), 7.24-7.30 (m’s, 15 H, aryl H), 7.42 (s, 2H, pyrrole)

13C{1H} NMR (C6D6): δC 29.1 (s, CH3), 38.3 (s, C quat, meso), 79.1 (s, CH2 benzyl), 111.2 (s, CH pyrrole), 122.4 (s, CH aryl), 122.7 (s, CH pyrrole), 126.6 (s, CH aryl), 128.8 (s, CH aryl) 136.0 (s, CH pyrrole), 147.5 (s, C quat, pyrrole), 149.7 (s, C quat, aryl).

***Synthesis of Ti(NMe2)2[L1] (2)***

1. The reaction between the dipyrromethane **L1** (10 mg, 0.06 mmol) and Ti(NMe2)4 (13 mg, 0.06 mmol) was monitored by 1H NMR spectroscopy, and was judged complete after 1 h at room temperature, yielding **2** quantitatively.

2. A solution of **L1** (0.50 g, 2.87 mmol) in toluene (10 mL) was added dropwise to a stirred solution of Ti(NMe)4 (0.64 g, 2.87 mmol) in toluene (10 mL) at room temperature. After 2 h, the red solution was evaporated to dryness under vacuum, and the resultant oil crystallised from Et2O (10 mL) at –30 ºC, yielding 0.60 g, 68 % of **2** as orange blocks.

Analysis: Found: C, 58.28; H, 7.73; N, 17.98. C15H24N4Ti requires: C, 58.45; H, 7.85; N, 18.18 %

1H NMR (C6D6): δH 1.82 (s, 6 H, CH3), 2.96 (s, 12 H, NMe2), 6.28 (m, 4 H, pyrrole), 6.95 (s, 2 H, pyrrole H)

13C{1H} NMR (C6D6): δC 30.0 (s, CH3), 39.8 (s, C quat, meso), 47.5 (s, NMe2), 108.0 (s, CH pyrrole), 112.3 (s, CH pyrrole), 125.7 (s, CH pyrrole), 163.2 (s, C quat, pyrrole).

***Synthesis of Ti(NMe2)2[L2] (3)***

A mixture of dipyrromethane **L2** (0.23 g, 0.70 mmol) and Ti(NMe2)4 (0.16 g, 0.70 mmol) in toluene (10 mL) was heated to 50 ºC for 1 h, after which the solvents were evaporated under vacuum. The resultant orange solids were crystallised from Et2O at –30 ºC, yielding 0.08 g, 26 % of **3** as orange microcrystals.

Analysis: Found: C, 69.51; H, 6.46; N, 13.04. C25H28N4Ti requires: C, 69.44; H, 6.53; N, 13.04 %

1H NMR (C6D6): δH 2.90 (s, 12 H, NMe2), 6.02 (m, 2 H, pyrrole H), 6.16 (m, 2 H, pyrrole), 7.05 (m’s, 8 H, pyrrole + aryl H), 7.59 (m, 4 H, *o*-H, aryl)

***Synthesis of Zr(NEt2)2[L1] (4)***

The reaction between the dipyrromethane **L1** (10 mg, 0.06 mmol) and Zr(NEt2)4 (15 mg, 0.06 mmol) in C6D6 was monitored by 1H NMR spectroscopy. After 1 h at room temperature, the solvent was evaporated under vacuum and the yellow solids of **4** were redissolved in C6D6.

1H NMR (C6D6): δH 0.85 (t, 12 H, *J* 6.9 Hz, NCH2CH3), 1.82 (s, 6 H, CH3), 3.19 (q, 8 H, *J* 6.9 Hz, NCH2CH3), 6.39 (m, 4 H, pyrrole), 6.97 (m’s, 2 H, pyrrole).

***Synthesis of Ti[L1]2 5***

Neat chlorotrimethylsilane (1.0 mL) was added to a stirred solution of **2** (0.88 g, 2.87 mmol) in toluene (25 mL). The mixture was stirred at room temperature for 16 h, the solvents removed under vacuum and the resulting brown/red solids were dissolved in CH2Cl2 (10 mL). Upon cooling to –30 ºC for 16 h, red needles of **5** were deposited, from which the liquors were decanted and the solids dried under vacuum. Yield 0.25 g, 60 %.

Analysis: Found: C, 59.00; H, 6.52; N, 12.84. C22H24N4Ti.CH2Cl2 requires: C, 57.93; H, 5.49; N, 11.74 %. Repeated poor analyses are attributed to non-stoichiometric CH2Cl2 solvent of crystallisation.

1H NMR (CD2Cl2): δH 1.69 (s, 6 H, CH3), 6.14 (m, 2 H, pyrrole), 6.23 (m, 2 H, pyrrole), 6.98 (s, 2 H, pyrrole H).

13C{1H} NMR (C6D6): δC 28.9 (s, CH3), 39.9 (s, C quat, meso), 106.9 (s, CH pyrrole), 110.5 (s, CH pyrrole), 129.7 (s, CH pyrrole), 145.9 (s, C quat, pyrrole).

# *Ethene Polymerisation and Analysis*

A solution of pro-catalyst (*ca*. 10 mg) in toluene (5 mL) was added to a mixture of MAO (1000 mol. eq) in toluene (100 mL) in a glass pressure vessel. To this mechanically stirred mixture was admitted ethene (10 bar) at ambient temperature and the reaction was allowed to progress for 1 h. The mixture was depressurised, quenched with dilute HCl in methanol (50 mL in portions) and filtered on a glass frit. The polymer was washed with water (3 x 100 mL), 2-propanol (3 x 100 mL) and dried at 60 ºC until constant weight.

***Analysis* - Sample Preparation**

A single solution of each sample was prepared by adding 15 ml of solvent to 7.5 mg* of sample and heating for 40 minutes* at 190°C, with shaking. The solution was cooled to 160°C and hot filtered into autosampler vials. The vials were then placed in a heated sample compartment and after an initial delay of thirty minutes to allow the first solution to equilibrate thermally, injection of part of the contents of each vial was carried out automatically.

* This is half the normal concentration used and twice the usual dissolution time due to the poor solubility of the samples. All masses, volumes, times and temperatures in this section are only approximate.

**2.2 Chromatographic Conditions**

Instrument: Polymer Laboratories PL220

Columns: PLgel guard plus 2 x mixed bed-B, 30 cm, 10 microns,

Solvent: 1,2,4 -trichlorobenzene with anti-oxidant,

Flow-rate: 1.0 ml/min (nominal),

Temperature: 160oC (nominal),

Detector: refractive index (& Viscotek differential pressure).

Data capture and subsequent data handling was carried out using Viscotek ‘Trisec’ 3.0 software.

Results

| ***Sample*** | ***Run No.*** | ***Mw*** | ***Mn*** | ***Polydispersity*** |
| --- | --- | --- | --- | --- |
| ZRDPM | B2190 | 1,160,000 | 15,100 | 77 |
| (RTL1292 / 1) | B2192 | 1,240,000 | 15,000 | 83 |
|  |  |  |  |  |
| ZRCP | B2191 | 49,000 | 12,700 | 3.9 |
| (RTL1292 / 2) | B2193 | 49,200 | 12,700 | 3.9 |

S A Jones (author), S R Holding (principal consultant), Rapra Technology.

Structure ZRPHYR. {Zr(CH2Ph)3}2[**L1**]


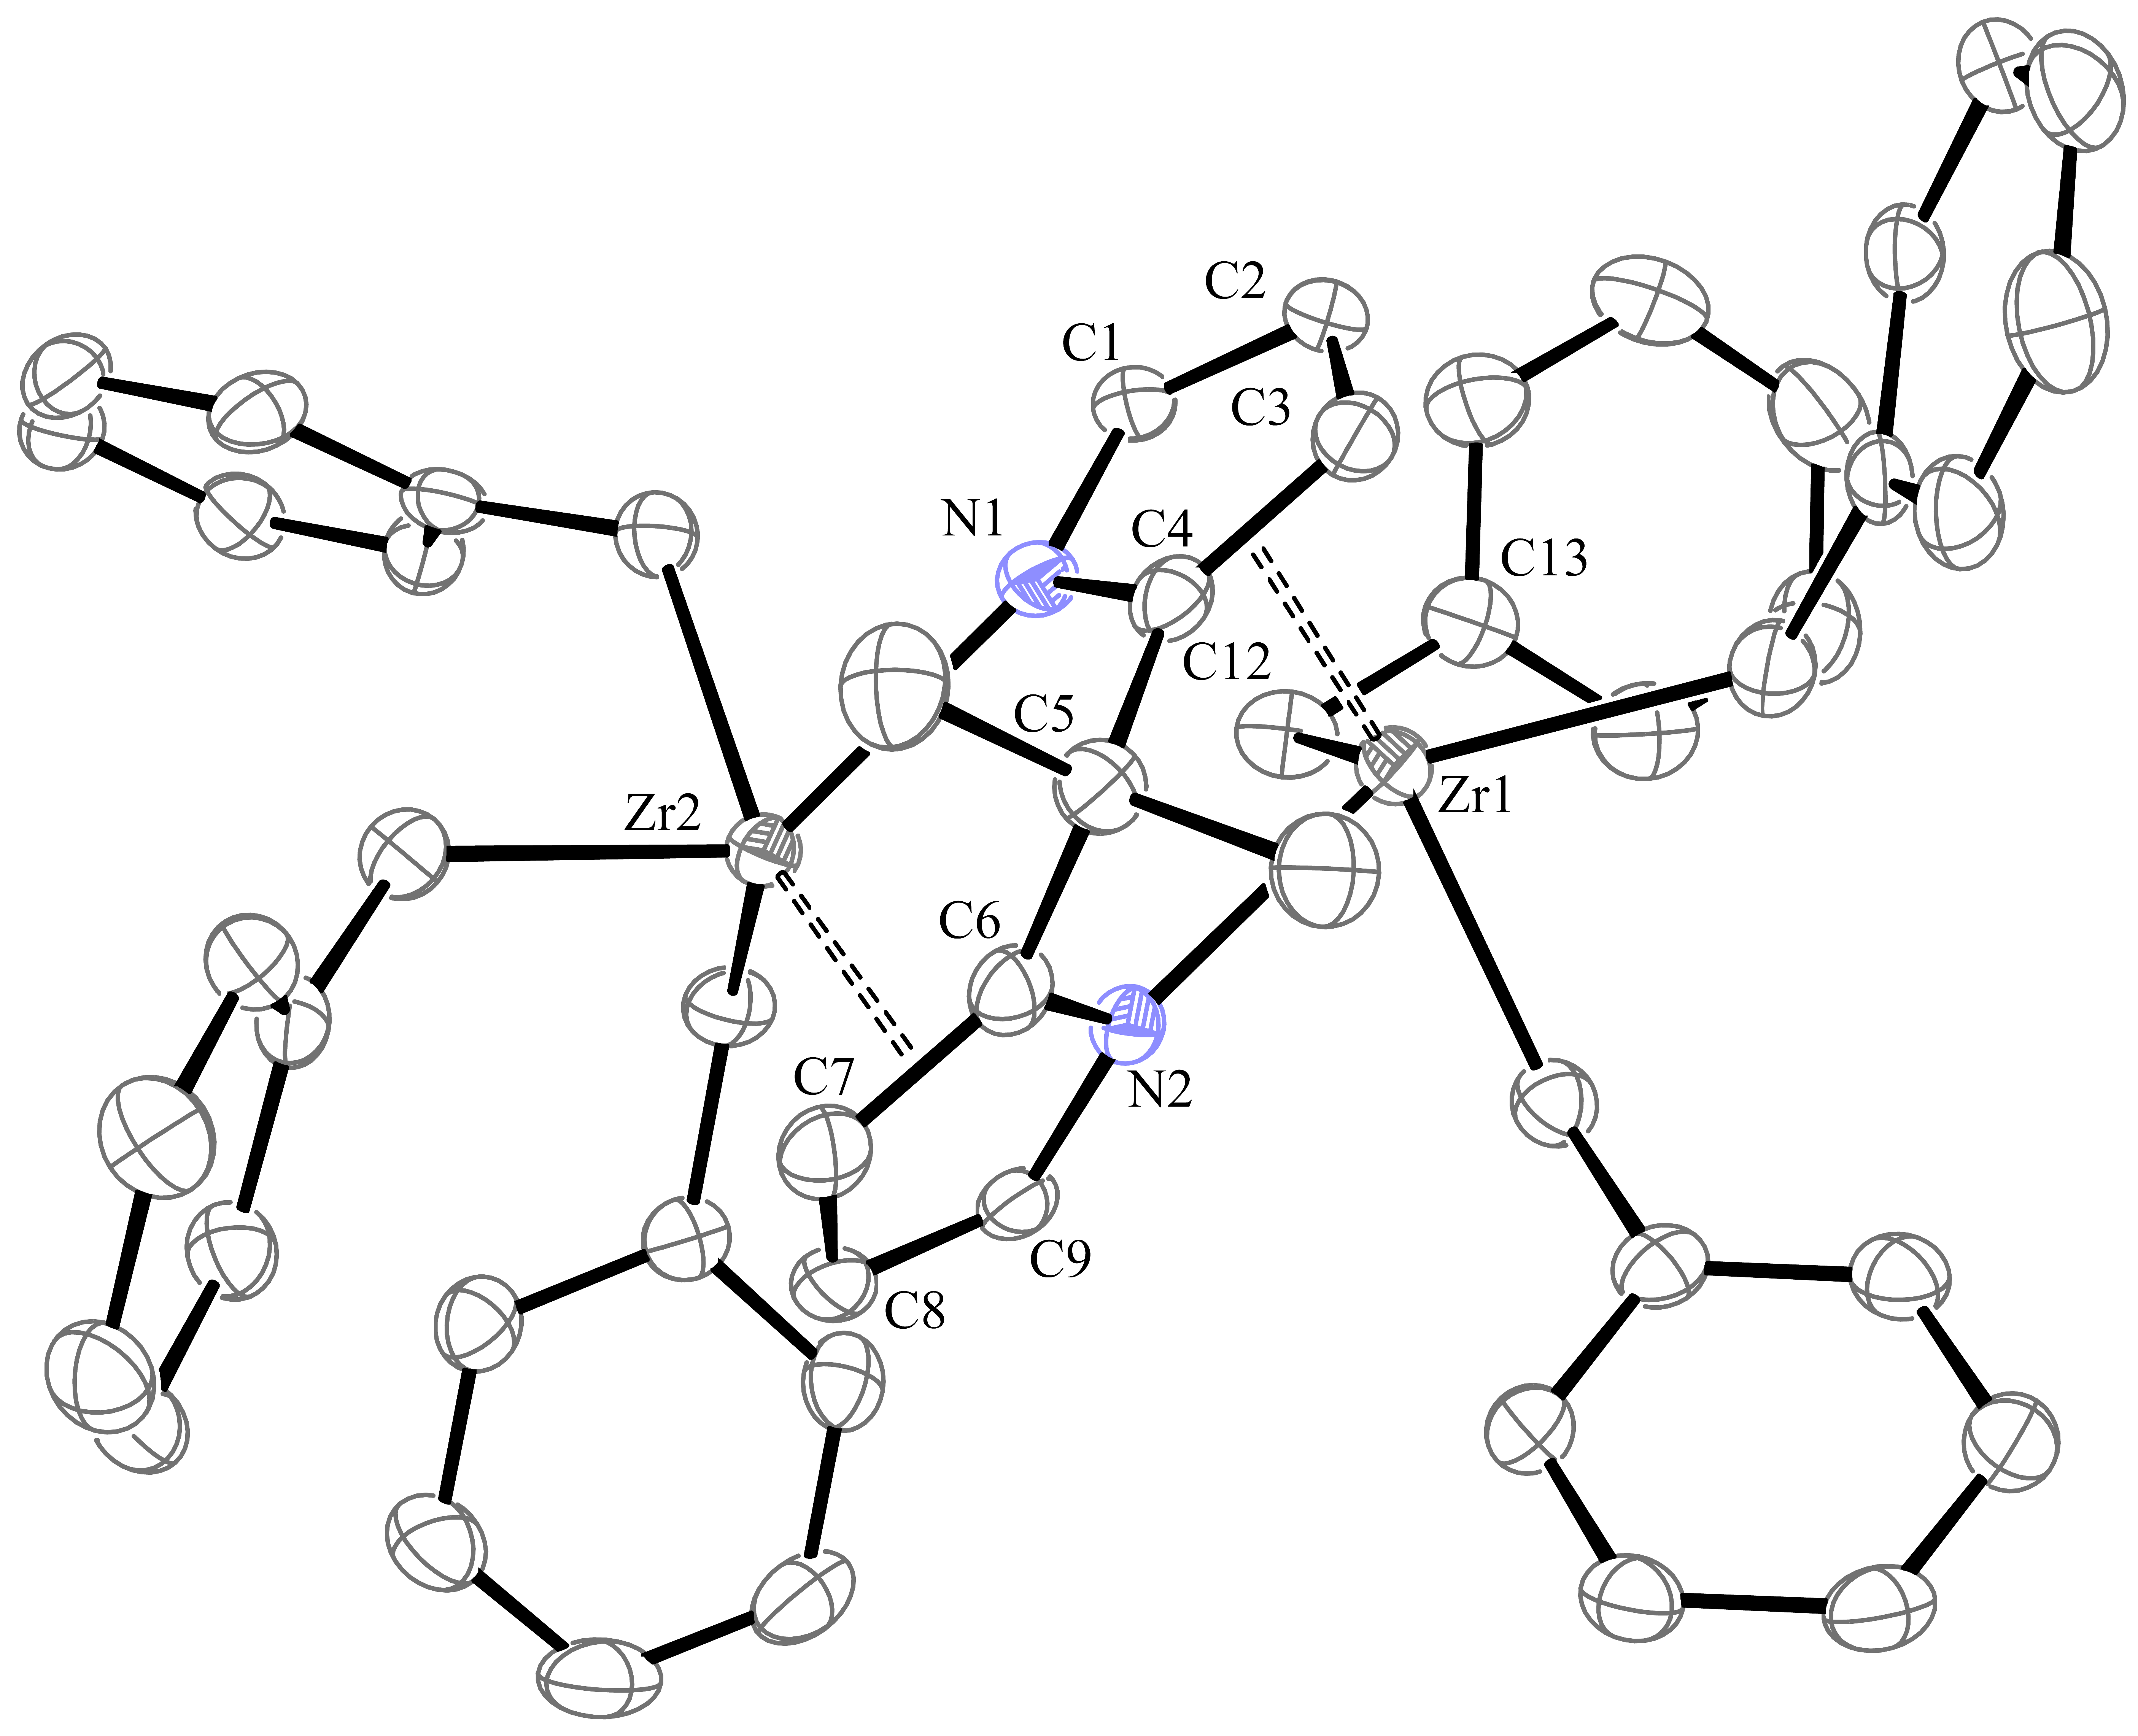


Table 1. Crystal data and structure refinement for ZRPHYR.

Identification code ZRPHYR

Empirical formula C53 H54 N2 Zr2

Formula weight 901.42

Temperature 150(2) K

Wavelength 0.71073 Å

Crystal system Monoclinic

Space group P2(1)/c

Unit cell dimensions a = 18.8621(13) Å = 90°.

b = 11.2299(8) Å = 96.096(2)°.

c = 20.6506(14) Å  = 90°.

Volume 4349.5(5) Å3

Z 4

Density (calculated) 1.377 Mg/m3

Absorption coefficient 0.517 mm-1

F(000) 1864

Crystal size 0.17 x 0.12 x 0.08 mm3

Theta range for data collection 1.98 to 25.00°.

Index ranges -24<=h<=24, -14<=k<=14, -26<=l<=25

Reflections collected 33815

Independent reflections 7620 [R(int) = 0.055]

Completeness to theta = 25.00° 99.5 %

Absorption correction Semi-empirical from equivalents

Max. and min. transmission 1.000 and 0.942

Refinement method Full-matrix least-squares on F2

Data / restraints / parameters 7620 / 0 / 514

Goodness-of-fit on F2 1.043

Final R indices [I>2sigma(I)] R1 = 0.0343, wR2 = 0.0637

R indices (all data) R1 = 0.0578, wR2 = 0.0728

Largest diff. peak and hole 0.41 and -0.31 e.Å-3

Table 2. Atomic coordinates ( x 104) and equivalent isotropic displacement parameters (Å2x 103)

for ZRPHYR. U(eq) is defined as one third of the trace of the orthogonalized Uij tensor.

________________________________________________________________________________

x y z U(eq)

________________________________________________________________________________

Zr(1) 1561(1) 1163(1) 3290(1) 23(1)

Zr(2) 2909(1) 3347(1) 4056(1) 22(1)

N(1) 1944(1) 3257(2) 3246(1) 23(1)

N(2) 2791(1) 1402(2) 3498(1) 22(1)

C(1) 1223(2) 3438(3) 3253(2) 27(1)

C(2) 850(2) 3042(3) 2685(2) 29(1)

C(3) 1361(2) 2623(3) 2285(2) 29(1)

C(4) 2023(2) 2773(3) 2633(2) 25(1)

C(5) 2766(2) 2510(3) 2462(2) 27(1)

C(6) 3166(2) 2092(3) 3093(2) 26(1)

C(7) 3860(2) 2265(3) 3373(2) 30(1)

C(8) 3917(2) 1670(3) 3978(2) 29(1)

C(9) 3266(2) 1146(3) 4034(2) 26(1)

C(10) 3102(2) 3645(3) 2211(2) 38(1)

C(11) 2753(2) 1524(3) 1946(2) 36(1)

C(12) 1176(2) 1454(3) 4288(2) 34(1)

C(13) 429(2) 1042(3) 4171(2) 32(1)

C(14) 247(2) -155(3) 4231(2) 38(1)

C(15) -445(2) -546(4) 4086(2) 45(1)

C(16) -977(2) 235(4) 3878(2) 60(1)

C(17) -814(2) 1432(4) 3820(2) 58(1)

C(18) -124(2) 1831(3) 3962(2) 43(1)

C(19) 790(2) 94(3) 2563(2) 34(1)

C(20) 420(2) 459(3) 1923(2) 25(1)

C(21) 723(2) 247(3) 1349(2) 35(1)

C(22) 408(2) 636(3) 755(2) 44(1)

C(23) -229(2) 1242(3) 710(2) 43(1)

C(24) -549(2) 1438(3) 1261(2) 37(1)

C(25) -234(2) 1059(3) 1864(2) 30(1)

C(26) 1924(2) -717(3) 3607(2) 28(1)

C(27) 2332(2) -1510(3) 3199(2) 27(1)

C(28) 3071(2) -1427(3) 3194(2) 31(1)

C(29) 3447(2) -2179(3) 2833(2) 31(1)

C(30) 3105(2) -3065(3) 2457(2) 33(1)

C(31) 2377(2) -3172(3) 2451(2) 36(1)

C(32) 2000(2) -2405(3) 2808(2) 31(1)

C(33) 3746(2) 4771(3) 4045(2) 31(1)

C(34) 4485(2) 4668(3) 3859(2) 28(1)

C(35) 5027(2) 4126(3) 4270(2) 30(1)

C(36) 5698(2) 3953(3) 4080(2) 34(1)

C(37) 5852(2) 4311(3) 3474(2) 37(1)

C(38) 5332(2) 4871(3) 3061(2) 37(1)

C(39) 4661(2) 5054(3) 3254(2) 32(1)

C(40) 2926(2) 2781(3) 5129(2) 29(1)

C(41) 3527(2) 2098(3) 5472(1) 26(1)

C(42) 4170(2) 2668(3) 5677(2) 33(1)

C(43) 4754(2) 2042(3) 5962(2) 43(1)

C(44) 4712(2) 834(4) 6057(2) 48(1)

C(45) 4079(2) 246(3) 5877(2) 40(1)

C(46) 3496(2) 879(3) 5593(2) 32(1)

C(47) 2168(2) 4826(3) 4341(2) 29(1)

C(48) 2353(2) 5793(3) 4828(2) 27(1)

C(49) 2237(2) 5681(3) 5482(2) 30(1)

C(50) 2394(2) 6593(3) 5922(2) 32(1)

C(51) 2677(2) 7653(3) 5727(2) 33(1)

C(52) 2806(2) 7773(3) 5083(2) 33(1)

C(53) 2648(2) 6861(3) 4644(2) 30(1)

________________________________________________________________________________

Table 3. Bond lengths [Å] and angles [°] for ZRPHYR.

_____________________________________________________

Zr(1)-C(12) 2.279(3)

Zr(1)-C(26) 2.293(3)

Zr(1)-C(19) 2.313(3)

Zr(1)-N(2) 2.330(2)

Zr(1)-N(1) 2.465(3)

Zr(1)-C(4) 2.475(3)

Zr(1)-C(1) 2.633(3)

Zr(1)-C(3) 2.642(3)

Zr(1)-C(2) 2.732(3)

Zr(2)-C(33) 2.248(3)

Zr(2)-C(47) 2.289(3)

Zr(2)-C(40) 2.303(3)

Zr(2)-N(1) 2.339(2)

Zr(2)-N(2) 2.468(2)

Zr(2)-C(6) 2.525(3)

Zr(2)-C(9) 2.563(3)

Zr(2)-C(7) 2.687(3)

Zr(2)-C(8) 2.692(3)

N(1)-C(1) 1.376(4)

N(1)-C(4) 1.400(4)

N(2)-C(9) 1.379(4)

N(2)-C(6) 1.386(4)

C(2)-C(1) 1.377(4)

C(2)-C(3) 1.415(4)

C(3)-C(4) 1.384(4)

C(4)-C(5) 1.511(4)

C(5)-C(6) 1.510(4)

C(5)-C(11) 1.535(4)

C(5)-C(10) 1.537(4)

C(6)-C(7) 1.389(4)

C(7)-C(8) 1.411(5)

C(8)-C(9) 1.377(4)

C(12)-C(13) 1.479(4)

C(13)-C(14) 1.395(5)

C(13)-C(18) 1.401(5)

C(14)-C(15) 1.380(5)

C(15)-C(16) 1.367(5)

C(16)-C(17) 1.387(6)

C(17)-C(18) 1.379(5)

C(19)-C(20) 1.485(4)

C(20)-C(21) 1.391(4)

C(20)-C(25) 1.399(4)

C(21)-C(22) 1.375(5)

C(23)-C(24) 1.362(5)

C(23)-C(22) 1.375(5)

C(24)-C(25) 1.387(5)

C(26)-C(27) 1.494(4)

C(27)-C(32) 1.395(4)

C(27)-C(28) 1.399(4)

C(28)-C(29) 1.372(4)

C(29)-C(30) 1.380(5)

C(30)-C(31) 1.377(5)

C(31)-C(32) 1.379(5)

C(33)-C(34) 1.489(4)

C(34)-C(39) 1.396(4)

C(34)-C(35) 1.398(4)

C(35)-C(36) 1.378(4)

C(36)-C(37) 1.374(5)

C(37)-C(38) 1.381(5)

C(39)-C(38) 1.382(5)

C(40)-C(41) 1.484(4)

C(41)-C(46) 1.394(4)

C(41)-C(42) 1.397(4)

C(42)-C(43) 1.385(5)

C(43)-C(44) 1.374(5)

C(44)-C(45) 1.379(5)

C(45)-C(46) 1.386(5)

C(47)-C(48) 1.496(4)

C(48)-C(53) 1.392(4)

C(48)-C(49) 1.396(4)

C(49)-C(50) 1.381(4)

C(50)-C(51) 1.382(5)

C(51)-C(52) 1.382(5)

C(52)-C(53) 1.379(4)

C(12)-Zr(1)-C(26) 89.34(12)

C(12)-Zr(1)-C(19) 115.00(12)

C(26)-Zr(1)-C(19) 81.70(11)

C(12)-Zr(1)-N(2) 102.94(10)

C(26)-Zr(1)-N(2) 78.03(10)

C(19)-Zr(1)-N(2) 136.45(11)

C(12)-Zr(1)-N(1) 91.09(11)

C(26)-Zr(1)-N(1) 144.01(10)

C(19)-Zr(1)-N(1) 129.63(10)

N(2)-Zr(1)-N(1) 66.82(8)

C(12)-Zr(1)-C(4) 123.72(11)

C(26)-Zr(1)-C(4) 135.85(11)

C(19)-Zr(1)-C(4) 104.89(11)

N(2)-Zr(1)-C(4) 67.32(9)

N(1)-Zr(1)-C(4) 32.94(9)

C(12)-Zr(1)-C(1) 77.75(11)

C(26)-Zr(1)-C(1) 165.00(11)

C(19)-Zr(1)-C(1) 110.56(11)

N(2)-Zr(1)-C(1) 97.25(9)

N(1)-Zr(1)-C(1) 31.10(8)

C(4)-Zr(1)-C(1) 51.15(10)

C(12)-Zr(1)-C(3) 126.03(11)

C(26)-Zr(1)-C(3) 144.05(11)

C(19)-Zr(1)-C(3) 77.54(11)

N(2)-Zr(1)-C(3) 97.43(9)

N(1)-Zr(1)-C(3) 52.88(9)

C(4)-Zr(1)-C(3) 31.18(9)

C(1)-Zr(1)-C(3) 50.22(10)

C(12)-Zr(1)-C(2) 96.56(11)

C(26)-Zr(1)-C(2) 163.57(10)

C(19)-Zr(1)-C(2) 81.91(10)

N(2)-Zr(1)-C(2) 115.22(9)

N(1)-Zr(1)-C(2) 51.51(9)

C(4)-Zr(1)-C(2) 50.87(10)

C(1)-Zr(1)-C(2) 29.66(9)

C(3)-Zr(1)-C(2) 30.47(10)

C(33)-Zr(2)-C(47) 86.28(11)

C(33)-Zr(2)-C(40) 105.51(12)

C(47)-Zr(2)-C(40) 84.20(11)

C(33)-Zr(2)-N(1) 121.19(11)

C(47)-Zr(2)-N(1) 76.38(10)

C(40)-Zr(2)-N(1) 127.29(10)

C(33)-Zr(2)-N(2) 130.82(10)

C(47)-Zr(2)-N(2) 137.30(10)

C(40)-Zr(2)-N(2) 101.33(10)

N(1)-Zr(2)-N(2) 66.64(8)

C(33)-Zr(2)-C(6) 101.32(11)

C(47)-Zr(2)-C(6) 141.35(11)

C(40)-Zr(2)-C(6) 128.29(11)

N(1)-Zr(2)-C(6) 67.23(9)

N(2)-Zr(2)-C(6) 32.22(9)

C(33)-Zr(2)-C(9) 120.00(11)

C(47)-Zr(2)-C(9) 150.80(11)

C(40)-Zr(2)-C(9) 76.92(11)

N(1)-Zr(2)-C(9) 97.57(9)

N(2)-Zr(2)-C(9) 31.74(8)

C(6)-Zr(2)-C(9) 51.37(10)

C(33)-Zr(2)-C(7) 78.94(11)

C(47)-Zr(2)-C(7) 157.46(11)

C(40)-Zr(2)-C(7) 116.01(11)

N(1)-Zr(2)-C(7) 96.78(9)

N(2)-Zr(2)-C(7) 52.21(9)

C(6)-Zr(2)-C(7) 30.71(9)

C(9)-Zr(2)-C(7) 50.50(10)

C(33)-Zr(2)-C(8) 89.80(11)

C(47)-Zr(2)-C(8) 167.87(10)

C(40)-Zr(2)-C(8) 85.80(10)

N(1)-Zr(2)-C(8) 115.33(9)

N(2)-Zr(2)-C(8) 51.87(9)

C(6)-Zr(2)-C(8) 50.74(10)

C(9)-Zr(2)-C(8) 30.26(9)

C(7)-Zr(2)-C(8) 30.41(10)

C(1)-N(1)-C(4) 105.5(2)

C(1)-N(1)-Zr(2) 132.9(2)

C(4)-N(1)-Zr(2) 120.88(19)

C(1)-N(1)-Zr(1) 81.21(17)

C(4)-N(1)-Zr(1) 73.92(16)

Zr(2)-N(1)-Zr(1) 102.93(9)

C(9)-N(2)-C(6) 105.8(2)

C(9)-N(2)-Zr(1) 132.3(2)

C(6)-N(2)-Zr(1) 120.99(19)

C(9)-N(2)-Zr(2) 77.94(16)

C(6)-N(2)-Zr(2) 76.14(16)

Zr(1)-N(2)-Zr(2) 103.12(9)

C(1)-C(2)-C(3) 106.6(3)

C(1)-C(2)-Zr(1) 71.18(18)

C(3)-C(2)-Zr(1) 71.22(17)

C(4)-C(3)-C(2) 106.9(3)

C(4)-C(3)-Zr(1) 67.75(17)

C(2)-C(3)-Zr(1) 78.31(18)

N(1)-C(1)-C(2) 111.2(3)

N(1)-C(1)-Zr(1) 67.69(16)

C(2)-C(1)-Zr(1) 79.15(18)

C(3)-C(4)-N(1) 109.9(3)

C(3)-C(4)-C(5) 131.6(3)

N(1)-C(4)-C(5) 118.6(3)

C(3)-C(4)-Zr(1) 81.07(19)

N(1)-C(4)-Zr(1) 73.15(16)

C(5)-C(4)-Zr(1) 112.05(19)

C(6)-C(5)-C(4) 104.4(3)

C(6)-C(5)-C(11) 110.2(3)

C(4)-C(5)-C(11) 110.9(3)

C(6)-C(5)-C(10) 111.3(3)

C(4)-C(5)-C(10) 110.0(3)

C(11)-C(5)-C(10) 110.0(3)

N(2)-C(6)-C(7) 110.2(3)

N(2)-C(6)-C(5) 117.1(3)

C(7)-C(6)-C(5) 132.7(3)

N(2)-C(6)-Zr(2) 71.64(16)

C(7)-C(6)-Zr(2) 81.11(18)

C(5)-C(6)-Zr(2) 112.75(19)

C(6)-C(7)-C(8) 106.3(3)

C(6)-C(7)-Zr(2) 68.18(17)

C(8)-C(7)-Zr(2) 75.00(18)

C(9)-C(8)-C(7) 107.1(3)

C(9)-C(8)-Zr(2) 69.69(17)

C(7)-C(8)-Zr(2) 74.60(18)

C(8)-C(9)-N(2) 110.6(3)

C(8)-C(9)-Zr(2) 80.05(19)

N(2)-C(9)-Zr(2) 70.32(15)

C(13)-C(12)-Zr(1) 101.4(2)

C(14)-C(13)-C(18) 117.1(3)

C(14)-C(13)-C(12) 121.7(3)

C(18)-C(13)-C(12) 121.1(3)

C(15)-C(14)-C(13) 121.5(3)

C(16)-C(15)-C(14) 120.6(4)

C(15)-C(16)-C(17) 119.2(4)

C(18)-C(17)-C(16) 120.6(4)

C(17)-C(18)-C(13) 121.0(4)

C(20)-C(19)-Zr(1) 129.7(2)

C(21)-C(20)-C(25) 116.5(3)

C(21)-C(20)-C(19) 121.0(3)

C(25)-C(20)-C(19) 122.5(3)

C(22)-C(21)-C(20) 121.8(3)

C(24)-C(23)-C(22) 118.9(3)

C(21)-C(22)-C(23) 120.7(3)

C(23)-C(24)-C(25) 121.0(3)

C(24)-C(25)-C(20) 121.1(3)

C(27)-C(26)-Zr(1) 123.0(2)

C(32)-C(27)-C(28) 115.5(3)

C(32)-C(27)-C(26) 122.0(3)

C(28)-C(27)-C(26) 122.5(3)

C(29)-C(28)-C(27) 122.5(3)

C(28)-C(29)-C(30) 120.7(3)

C(31)-C(30)-C(29) 118.4(3)

C(30)-C(31)-C(32) 120.7(3)

C(31)-C(32)-C(27) 122.3(3)

C(34)-C(33)-Zr(2) 128.7(2)

C(39)-C(34)-C(35) 116.8(3)

C(39)-C(34)-C(33) 121.7(3)

C(35)-C(34)-C(33) 121.5(3)

C(36)-C(35)-C(34) 121.6(3)

C(37)-C(36)-C(35) 120.5(3)

C(36)-C(37)-C(38) 119.3(3)

C(38)-C(39)-C(34) 121.5(3)

C(37)-C(38)-C(39) 120.2(3)

C(41)-C(40)-Zr(2) 122.3(2)

C(46)-C(41)-C(42) 116.5(3)

C(46)-C(41)-C(40) 123.3(3)

C(42)-C(41)-C(40) 120.1(3)

C(43)-C(42)-C(41) 121.5(3)

C(44)-C(43)-C(42) 120.4(3)

C(43)-C(44)-C(45) 119.8(3)

C(44)-C(45)-C(46) 119.6(3)

C(45)-C(46)-C(41) 122.2(3)

C(48)-C(47)-Zr(2) 126.5(2)

C(53)-C(48)-C(49) 116.7(3)

C(53)-C(48)-C(47) 120.9(3)

C(49)-C(48)-C(47) 122.4(3)

C(50)-C(49)-C(48) 121.7(3)

C(49)-C(50)-C(51) 120.6(3)

C(52)-C(51)-C(50) 118.5(3)

C(53)-C(52)-C(51) 120.8(3)

C(52)-C(53)-C(48) 121.7(3)

_______________________________________

Table 4. Anisotropic displacement parameters (Å2x 103) for ZRPHYR. The anisotropic

displacement factor exponent takes the form: -22[ h2 a*2U11 + ... + 2 h k a* b* U12 ]

______________________________________________________________________________

U11 U22 U33 U23 U13 U12

______________________________________________________________________________

Zr(1) 24(1) 22(1) 21(1) 0(1) -1(1) 0(1)

Zr(2) 22(1) 20(1) 22(1) -3(1) -1(1) 2(1)

N(1) 26(1) 21(1) 22(2) -2(1) -2(1) 4(1)

N(2) 24(1) 20(1) 21(1) -3(1) 0(1) 1(1)

C(1) 24(2) 23(2) 33(2) -3(2) -1(1) 5(1)

C(2) 27(2) 24(2) 34(2) 2(2) -9(2) 3(1)

C(3) 38(2) 23(2) 22(2) 1(1) -6(2) 0(2)

C(4) 34(2) 19(2) 21(2) 2(1) 0(1) 0(1)

C(5) 31(2) 28(2) 21(2) -1(1) 1(1) 0(1)

C(6) 27(2) 23(2) 28(2) -7(1) 5(1) 1(1)

C(7) 27(2) 28(2) 35(2) -9(2) 9(2) 3(1)

C(8) 26(2) 26(2) 33(2) -11(2) -4(1) 8(1)

C(9) 33(2) 18(2) 25(2) -4(1) -6(1) 7(1)

C(10) 45(2) 38(2) 32(2) 4(2) 7(2) -9(2)

C(11) 41(2) 39(2) 27(2) -5(2) 3(2) 1(2)

C(12) 33(2) 38(2) 31(2) 4(2) 6(2) 4(2)

C(13) 34(2) 40(2) 21(2) -5(2) 7(1) 6(2)

C(14) 45(2) 45(2) 25(2) -2(2) 10(2) 7(2)

C(15) 55(3) 47(2) 34(2) -3(2) -1(2) -8(2)

C(16) 45(3) 62(3) 70(3) 1(2) -15(2) -9(2)

C(17) 37(2) 58(3) 74(3) 2(2) -11(2) 12(2)

C(18) 40(2) 41(2) 48(2) -3(2) 4(2) 7(2)

C(19) 40(2) 28(2) 33(2) -2(2) -3(2) -2(2)

C(20) 25(2) 22(2) 26(2) -4(1) -1(1) -7(1)

C(21) 33(2) 38(2) 34(2) -13(2) 2(2) -2(2)

C(22) 51(2) 54(3) 26(2) -13(2) 3(2) -8(2)

C(23) 54(2) 42(2) 30(2) -3(2) -12(2) -6(2)

C(24) 34(2) 29(2) 45(2) -6(2) -13(2) 0(2)

C(25) 28(2) 30(2) 32(2) -9(2) 1(1) -2(2)

C(26) 28(2) 29(2) 27(2) 1(2) 1(1) -1(1)

C(27) 34(2) 24(2) 24(2) 7(1) 2(1) 3(1)

C(28) 31(2) 24(2) 36(2) 2(2) -2(2) 0(1)

C(29) 27(2) 31(2) 34(2) 6(2) 0(2) 3(2)

C(30) 40(2) 32(2) 26(2) 0(2) 1(2) 13(2)

C(31) 42(2) 30(2) 34(2) -1(2) -7(2) 2(2)

C(32) 29(2) 29(2) 35(2) 7(2) 1(2) 1(2)

C(33) 31(2) 27(2) 36(2) -6(2) 1(2) 2(2)

C(34) 25(2) 22(2) 36(2) -6(2) 1(1) -4(1)

C(35) 29(2) 31(2) 29(2) -2(2) 0(1) -2(2)

C(36) 27(2) 37(2) 37(2) -6(2) -4(2) 2(2)

C(37) 26(2) 42(2) 45(2) -8(2) 8(2) -1(2)

C(38) 34(2) 45(2) 33(2) 1(2) 8(2) -3(2)

C(39) 28(2) 29(2) 37(2) 3(2) -4(2) -2(2)

C(40) 32(2) 31(2) 24(2) -5(2) 2(1) 8(2)

C(41) 33(2) 29(2) 15(2) -2(1) 3(1) 4(1)

C(42) 39(2) 31(2) 27(2) -4(2) 0(2) -1(2)

C(43) 37(2) 48(2) 40(2) -6(2) -9(2) 3(2)

C(44) 47(2) 51(3) 42(2) -4(2) -10(2) 23(2)

C(45) 61(3) 28(2) 30(2) -3(2) -3(2) 11(2)

C(46) 39(2) 32(2) 23(2) -2(2) 0(2) -5(2)

C(47) 29(2) 28(2) 28(2) -4(2) 0(1) 1(1)

C(48) 21(2) 28(2) 31(2) -2(2) -3(1) 8(1)

C(49) 28(2) 27(2) 34(2) -2(2) 4(2) -1(1)

C(50) 29(2) 36(2) 30(2) -5(2) 3(1) 3(2)

C(51) 38(2) 26(2) 33(2) -10(2) -6(2) 5(2)

C(52) 42(2) 23(2) 32(2) 2(2) -3(2) 1(2)

C(53) 43(2) 26(2) 20(2) 0(1) -2(2) 7(2)

______________________________________________________________________________

Table 5. Hydrogen coordinates ( x 104) and isotropic displacement parameters (Å2x 10 3)

for ZRPHYR._____________________________________________________________________

x y z U(eq)

________________________________________________________________________________

H(1A) 1004 3868 3607 32

H(2A) 323 3106 2563 35

H(3A) 1267 2387 1817 34

H(7A) 4256 2654 3166 35

H(8A) 4361 1568 4283 34

H(9A) 3176 554 4378 31

H(10A) 3108 4270 2542 57

H(10B) 2821 3913 1811 57

H(10C) 3591 3475 2120 57

H(11A) 2535 806 2108 54

H(11B) 3241 1346 1855 54

H(11C) 2473 1791 1545 54

H(12A) 1453 971 4627 41

H(12B) 1203 2304 4415 41

H(14A) 609 -713 4375 45

H(15A) -553 -1366 4132 55

H(16A) -1452 -39 3775 72

H(17A) -1182 1983 3681 69

H(18A) -21 2653 3917 51

H(19A) 1057 -635 2470 41

H(19B) 404 -173 2819 41

H(21A) 1160 -178 1367 42

H(22A) 633 485 373 53

H(23A) -443 1519 300 52

H(24A) -994 1840 1233 45

H(25A) -465 1210 2242 36

H(26A) 2216 -632 4032 34

H(26B) 1490 -1160 3692 34

H(28A) 3322 -828 3449 37

H(29A) 3949 -2089 2843 37

H(30A) 3364 -3587 2208 39

H(31A) 2131 -3780 2198 43

H(32A) 1497 -2489 2787 37

H(33A) 3520 5409 3764 37

H(33B) 3802 5099 4493 37

H(35A) 4931 3870 4690 36

H(36A) 6057 3583 4369 41

H(37A) 6312 4176 3341 45

H(38A) 5436 5130 2644 45

H(39A) 4311 5452 2967 38

H(40A) 2877 3518 5384 35

H(40B) 2489 2307 5162 35

H(42A) 4208 3504 5619 39

H(43A) 5187 2449 6093 51

H(44A) 5116 406 6247 57

H(45A) 4044 -587 5946 48

H(46A) 3061 468 5477 38

H(47A) 1996 5237 3929 34

H(47B) 1748 4416 4486 34

H(49A) 2046 4958 5627 36

H(50A) 2306 6491 6363 38

H(51A) 2781 8284 6028 40

H(52A) 3005 8492 4942 39

H(53A) 2744 6964 4205 36

Structure TIPMEA. Ti(NMe2)2[**L1**]


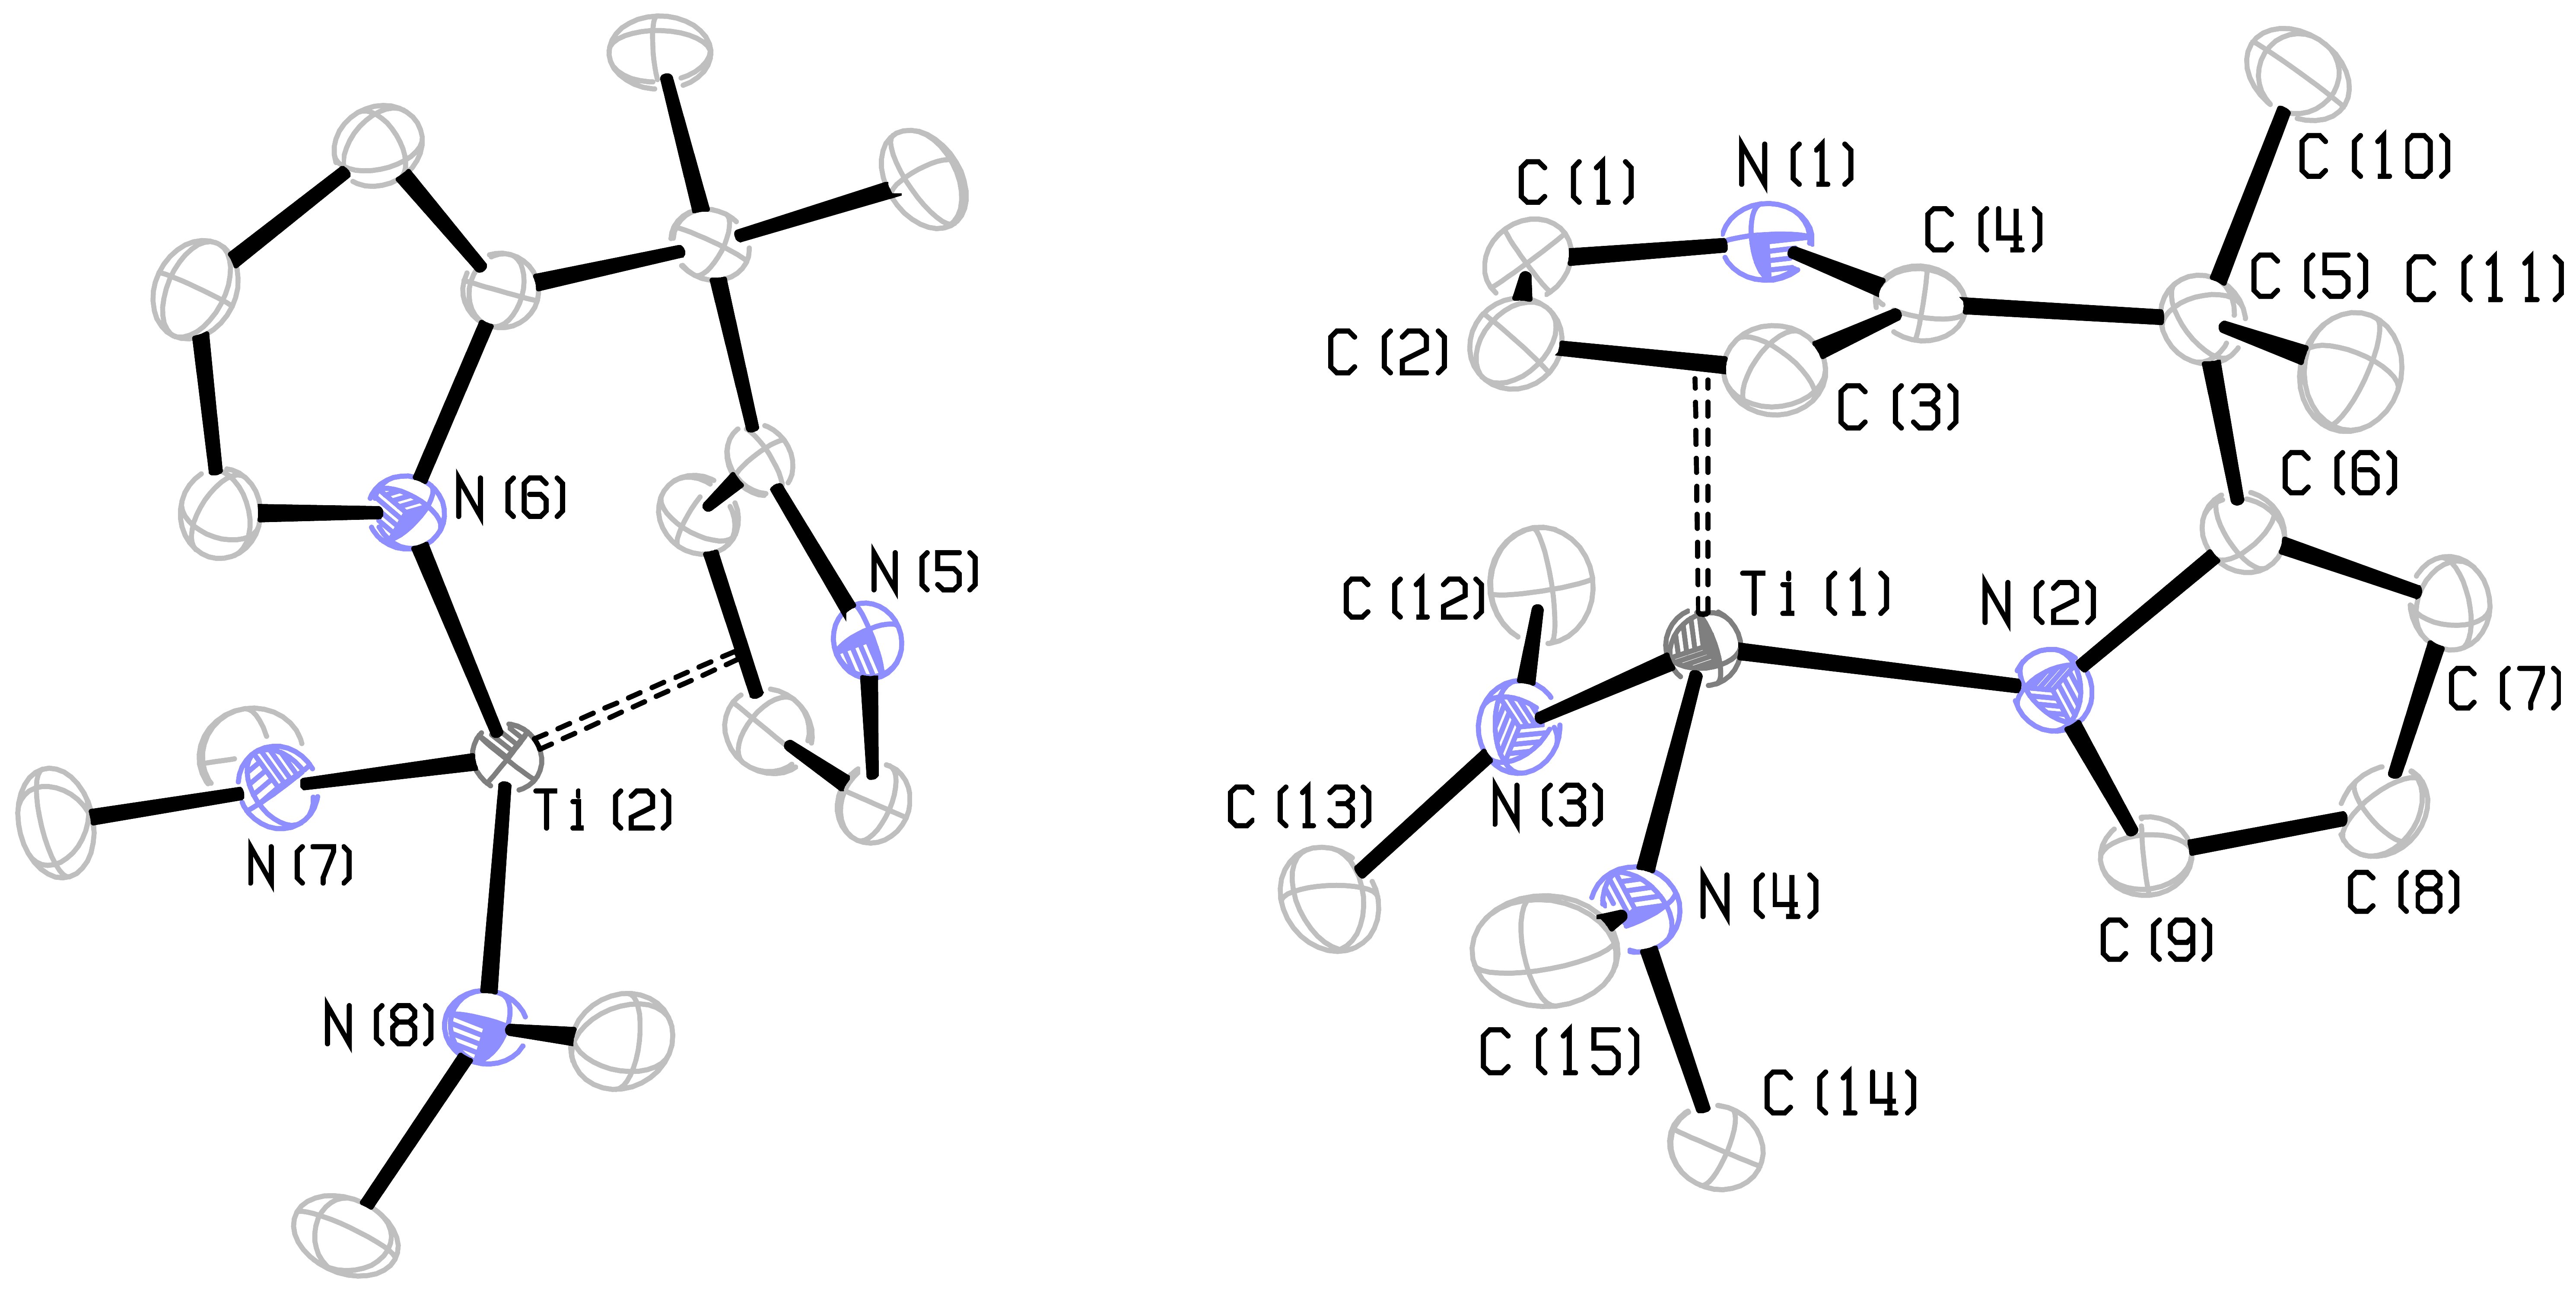


Table 1. Crystal data and structure refinement for tipmea.

Identification code tipmea

Empirical formula C15 H24 N4 Ti

Formula weight 308.28

Temperature 150(2) K

Wavelength 0.71073 Å

Crystal system Monoclinic

Space group P2(1)/c

Unit cell dimensions a = 10.3274(6) Å = 90°.

b = 12.3793(7) Å = 86.295(1)°.

c = 25.3112(14) Å  = 90°.

Volume 3229.2(3) Å3

Z 8

Density (calculated) 1.268 Mg/m3

Absorption coefficient 0.527 mm-1

F(000) 1312

Crystal size 0.41 x 0.38 x 0.18 mm3

Theta range for data collection 1.83 to 28.72°.

Index ranges -13<=h<=7, -16<=k<=16, -29<=l<=33

Reflections collected 19861

Independent reflections 7881 [R(int) = 0.021]

Completeness to theta = 27.50° 98.2 %

Absorption correction Semi-empirical from equivalents

Max. and min. transmission 1.000 and 0.901

Refinement method Full-matrix least-squares on F2

Data / restraints / parameters 7536 / 0 / 369

Goodness-of-fit on F2 1.026

Final R indices [I>2sigma(I)] R1 = 0.0323, wR2 = 0.0799

R indices (all data) R1 = 0.0425, wR2 = 0.0856

Largest diff. peak and hole 0.341 and -0.246 e.Å-3

Table 2. Atomic coordinates ( x 104) and equivalent isotropic displacement parameters (Å2x 103)

for tipmea. U(eq) is defined as one third of the trace of the orthogonalized Uij tensor.

________________________________________________________________________________

x y z U(eq)

________________________________________________________________________________

Ti(1) 273(1) 6658(1) 1802(1) 19(1)

Ti(2) 4637(1) 2662(1) 380(1) 18(1)

N(1) -1618(1) 5749(1) 1762(1) 25(1)

N(2) -793(1) 7996(1) 1596(1) 21(1)

N(3) 1048(1) 6277(1) 1169(1) 26(1)

N(4) 1684(1) 7110(1) 2259(1) 24(1)

N(5) 2826(1) 3647(1) 437(1) 23(1)

N(6) 3973(1) 1669(1) 940(1) 20(1)

N(7) 5598(1) 1815(1) -78(1) 26(1)

N(8) 5896(1) 3451(1) 802(1) 24(1)

C(1) -688(2) 4988(1) 1906(1) 27(1)

C(2) -127(2) 5189(1) 2415(1) 28(1)

C(3) -780(2) 6105(1) 2601(1) 25(1)

C(4) -1686(2) 6424(1) 2197(1) 22(1)

C(5) -2556(2) 7411(1) 2167(1) 23(1)

C(6) -2015(2) 8183(1) 1771(1) 21(1)

C(7) -2513(2) 9131(1) 1556(1) 25(1)

C(8) -1555(2) 9555(1) 1234(1) 25(1)

C(9) -538(2) 8845(1) 1265(1) 23(1)

C(10) -3954(2) 7078(2) 1995(1) 33(1)

C(11) -2547(2) 7964(1) 2714(1) 32(1)

C(12) 230(2) 5958(2) 700(1) 38(1)

C(13) 2419(2) 6107(2) 1088(1) 40(1)

C(14) 2320(2) 8051(1) 2039(1) 29(1)

C(15) 2254(2) 6880(2) 2787(1) 42(1)

C(16) 3474(2) 4128(1) 44(1) 28(1)

C(17) 3488(2) 3460(1) -400(1) 29(1)

C(18) 2772(2) 2527(1) -282(1) 24(1)

C(19) 2378(1) 2670(1) 233(1) 20(1)

C(20) 1675(2) 1898(1) 580(1) 20(1)

C(21) 2689(2) 1358(1) 954(1) 19(1)

C(22) 2567(2) 606(1) 1347(1) 24(1)

C(23) 3825(2) 455(1) 1598(1) 25(1)

C(24) 4650(2) 1111(1) 1343(1) 24(1)

C(25) 924(2) 1051(1) 240(1) 28(1)

C(26) 709(2) 2539(2) 898(1) 29(1)

C(27) 6566(2) 1156(2) 226(1) 38(1)

C(28) 5552(2) 1496(2) -634(1) 37(1)

C(29) 7292(2) 3555(2) 753(1) 34(1)

C(30) 5482(2) 4024(1) 1268(1) 33(1)

Table 3. Bond lengths [Å] and angles [°] for tipmea.

___________________________________________

Ti(1)-N(4) 1.8866(13)

Ti(1)-N(3) 1.8962(13)

Ti(1)-N(2) 2.0389(13)

Ti(1)-N(1) 2.2507(13)

Ti(1)-C(1) 2.3152(16)

Ti(1)-C(4) 2.3317(15)

Ti(1)-C(2) 2.4419(16)

Ti(1)-C(3) 2.4548(15)

Ti(2)-N(7) 1.8906(14)

Ti(2)-N(8) 1.8993(13)

Ti(2)-N(6) 2.0289(13)

Ti(2)-N(5) 2.2452(13)

Ti(2)-C(16) 2.3084(16)

Ti(2)-C(19) 2.3386(15)

Ti(2)-C(17) 2.4451(16)

Ti(2)-C(18) 2.4764(15)

N(1)-C(1) 1.378(2)

N(1)-C(4) 1.388(2)

N(2)-C(9) 1.3789(19)

N(2)-C(6) 1.3840(19)

N(3)-C(13) 1.459(2)

N(3)-C(12) 1.466(2)

N(4)-C(15) 1.452(2)

N(4)-C(14) 1.465(2)

N(5)-C(16) 1.372(2)

N(5)-C(19) 1.3836(19)

N(6)-C(24) 1.3832(19)

N(6)-C(21) 1.3833(19)

N(7)-C(28) 1.460(2)

N(7)-C(27) 1.468(2)

N(8)-C(29) 1.460(2)

N(8)-C(30) 1.463(2)

C(1)-C(2) 1.401(2)

C(2)-C(3) 1.415(2)

C(3)-C(4) 1.398(2)

C(4)-C(5) 1.516(2)

C(5)-C(6) 1.518(2)

C(5)-C(10) 1.537(2)

C(5)-C(11) 1.543(2)

C(6)-C(7) 1.378(2)

C(7)-C(8) 1.424(2)

C(8)-C(9) 1.368(2)

C(16)-C(17) 1.395(2)

C(17)-C(18) 1.414(2)

C(18)-C(19) 1.401(2)

C(19)-C(20) 1.515(2)

C(20)-C(21) 1.519(2)

C(20)-C(25) 1.534(2)

C(20)-C(26) 1.541(2)

C(21)-C(22) 1.376(2)

C(22)-C(23) 1.420(2)

C(23)-C(24) 1.369(2)

N(4)-Ti(1)-N(3) 103.91(6)

N(4)-Ti(1)-N(2) 107.38(6)

N(3)-Ti(1)-N(2) 103.63(6)

N(4)-Ti(1)-N(1) 144.08(5)

N(3)-Ti(1)-N(1) 104.50(6)

N(2)-Ti(1)-N(1) 86.70(5)

N(4)-Ti(1)-C(1) 121.01(6)

N(3)-Ti(1)-C(1) 94.67(6)

N(2)-Ti(1)-C(1) 121.79(6)

N(1)-Ti(1)-C(1) 35.10(5)

N(4)-Ti(1)-C(4) 115.52(6)

N(3)-Ti(1)-C(4) 139.20(6)

N(2)-Ti(1)-C(4) 75.05(5)

N(1)-Ti(1)-C(4) 35.21(5)

C(1)-Ti(1)-C(4) 56.69(6)

N(4)-Ti(1)-C(2) 89.25(6)

N(3)-Ti(1)-C(2) 116.74(6)

N(2)-Ti(1)-C(2) 131.09(6)

N(1)-Ti(1)-C(2) 58.31(5)

C(1)-Ti(1)-C(2) 34.11(6)

C(4)-Ti(1)-C(2) 56.51(5)

N(4)-Ti(1)-C(3) 86.71(6)

N(3)-Ti(1)-C(3) 149.41(6)

N(2)-Ti(1)-C(3) 100.22(5)

N(1)-Ti(1)-C(3) 57.92(5)

C(1)-Ti(1)-C(3) 56.10(6)

C(4)-Ti(1)-C(3) 33.85(5)

C(2)-Ti(1)-C(3) 33.60(5)

N(7)-Ti(2)-N(8) 105.23(6)

N(7)-Ti(2)-N(6) 107.83(6)

N(8)-Ti(2)-N(6) 99.74(5)

N(7)-Ti(2)-N(5) 144.41(6)

N(8)-Ti(2)-N(5) 103.14(5)

N(6)-Ti(2)-N(5) 87.88(5)

N(7)-Ti(2)-C(16) 119.43(6)

N(8)-Ti(2)-C(16) 97.13(6)

N(6)-Ti(2)-C(16) 122.86(6)

N(5)-Ti(2)-C(16) 35.04(5)

N(7)-Ti(2)-C(19) 117.52(6)

N(8)-Ti(2)-C(19) 136.66(6)

N(6)-Ti(2)-C(19) 74.62(5)

N(5)-Ti(2)-C(19) 35.06(5)

C(16)-Ti(2)-C(19) 56.51(6)

N(7)-Ti(2)-C(17) 88.65(6)

N(8)-Ti(2)-C(17) 121.69(6)

N(6)-Ti(2)-C(17) 129.80(6)

N(5)-Ti(2)-C(17) 57.97(5)

C(16)-Ti(2)-C(17) 33.97(6)

C(19)-Ti(2)-C(17) 56.11(5)

N(7)-Ti(2)-C(18) 87.93(6)

N(8)-Ti(2)-C(18) 152.87(6)

N(6)-Ti(2)-C(18) 98.52(5)

N(5)-Ti(2)-C(18) 57.69(5)

C(16)-Ti(2)-C(18) 55.94(6)

C(19)-Ti(2)-C(18) 33.68(5)

C(17)-Ti(2)-C(18) 33.38(5)

C(1)-N(1)-C(4) 105.78(13)

C(1)-N(1)-Ti(1) 75.01(9)

C(4)-N(1)-Ti(1) 75.58(8)

C(9)-N(2)-C(6) 106.33(13)

C(9)-N(2)-Ti(1) 130.83(11)

C(6)-N(2)-Ti(1) 122.81(10)

C(13)-N(3)-C(12) 111.13(14)

C(13)-N(3)-Ti(1) 128.45(12)

C(12)-N(3)-Ti(1) 119.86(12)

C(15)-N(4)-C(14) 109.96(14)

C(15)-N(4)-Ti(1) 139.20(12)

C(14)-N(4)-Ti(1) 110.46(10)

C(16)-N(5)-C(19) 105.94(13)

C(16)-N(5)-Ti(2) 74.99(9)

C(19)-N(5)-Ti(2) 76.16(8)

C(24)-N(6)-C(21) 106.42(13)

C(24)-N(6)-Ti(2) 129.74(11)

C(21)-N(6)-Ti(2) 123.66(10)

C(28)-N(7)-C(27) 109.43(14)

C(28)-N(7)-Ti(2) 139.04(12)

C(27)-N(7)-Ti(2) 110.78(11)

C(29)-N(8)-C(30) 111.53(14)

C(29)-N(8)-Ti(2) 129.92(12)

C(30)-N(8)-Ti(2) 118.49(11)

N(1)-C(1)-C(2) 111.15(14)

N(1)-C(1)-Ti(1) 69.89(8)

C(2)-C(1)-Ti(1) 77.91(10)

C(1)-C(2)-C(3) 105.82(14)

C(1)-C(2)-Ti(1) 67.98(9)

C(3)-C(2)-Ti(1) 73.70(9)

C(4)-C(3)-C(2) 107.00(14)

C(4)-C(3)-Ti(1) 68.24(9)

C(2)-C(3)-Ti(1) 72.70(9)

N(1)-C(4)-C(3) 110.21(14)

N(1)-C(4)-C(5) 120.39(13)

C(3)-C(4)-C(5) 129.09(14)

N(1)-C(4)-Ti(1) 69.21(8)

C(3)-C(4)-Ti(1) 77.91(9)

C(5)-C(4)-Ti(1) 113.98(10)

C(4)-C(5)-C(6) 107.32(12)

C(4)-C(5)-C(10) 109.91(13)

C(6)-C(5)-C(10) 111.11(13)

C(4)-C(5)-C(11) 110.09(13)

C(6)-C(5)-C(11) 109.44(13)

C(10)-C(5)-C(11) 108.96(14)

C(7)-C(6)-N(2) 109.92(13)

C(7)-C(6)-C(5) 130.69(14)

N(2)-C(6)-C(5) 119.28(13)

C(6)-C(7)-C(8) 106.56(14)

C(9)-C(8)-C(7) 106.77(14)

C(8)-C(9)-N(2) 110.42(14)

N(5)-C(16)-C(17) 110.96(14)

N(5)-C(16)-Ti(2) 69.97(8)

C(17)-C(16)-Ti(2) 78.40(10)

C(16)-C(17)-C(18) 106.42(14)

C(16)-C(17)-Ti(2) 67.64(9)

C(18)-C(17)-Ti(2) 74.52(9)

C(19)-C(18)-C(17) 106.23(14)

C(19)-C(18)-Ti(2) 67.76(8)

C(17)-C(18)-Ti(2) 72.10(9)

N(5)-C(19)-C(18) 110.40(13)

N(5)-C(19)-C(20) 119.71(13)

C(18)-C(19)-C(20) 129.67(14)

N(5)-C(19)-Ti(2) 68.78(8)

C(18)-C(19)-Ti(2) 78.56(9)

C(20)-C(19)-Ti(2) 114.56(9)

C(19)-C(20)-C(21) 107.55(12)

C(19)-C(20)-C(25) 110.46(12)

C(21)-C(20)-C(25) 110.60(13)

C(19)-C(20)-C(26) 109.17(13)

C(21)-C(20)-C(26) 110.17(12)

C(25)-C(20)-C(26) 108.89(13)

C(22)-C(21)-N(6) 109.83(13)

C(22)-C(21)-C(20) 131.07(14)

N(6)-C(21)-C(20) 119.02(13)

C(21)-C(22)-C(23) 106.75(14)

C(24)-C(23)-C(22) 106.92(14)

C(23)-C(24)-N(6) 110.07(14)

___________________________________________

Symmetry transformations used to generate equivalent atoms:

Table 4. Anisotropic displacement parameters (Å2x 103) for tipmea. The anisotropic

displacement factor exponent takes the form: -22[ h2 a*2U11 + ... + 2 h k a* b* U12 ]

______________________________________________________________________________

U11 U22 U33 U23 U13 U12

______________________________________________________________________________

Ti(1) 18(1) 19(1) 20(1) 1(1) 1(1) 1(1)

Ti(2) 16(1) 19(1) 21(1) 0(1) 1(1) 0(1)

N(1) 22(1) 23(1) 29(1) -1(1) 2(1) -4(1)

N(2) 20(1) 21(1) 20(1) 2(1) 2(1) 1(1)

N(3) 28(1) 25(1) 26(1) -2(1) 6(1) 3(1)

N(4) 21(1) 23(1) 26(1) 3(1) -2(1) -1(1)

N(5) 18(1) 20(1) 31(1) -1(1) -1(1) 2(1)

N(6) 19(1) 21(1) 22(1) 1(1) -1(1) -1(1)

N(7) 24(1) 27(1) 29(1) -1(1) 6(1) 2(1)

N(8) 20(1) 23(1) 29(1) 3(1) -2(1) -3(1)

C(1) 26(1) 19(1) 36(1) 1(1) 4(1) -2(1)

C(2) 26(1) 23(1) 33(1) 10(1) 3(1) 1(1)

C(3) 26(1) 27(1) 23(1) 7(1) 4(1) -2(1)

C(4) 19(1) 23(1) 24(1) 2(1) 5(1) -3(1)

C(5) 22(1) 25(1) 23(1) 0(1) 4(1) 1(1)

C(6) 19(1) 24(1) 19(1) -2(1) 1(1) 0(1)

C(7) 23(1) 25(1) 26(1) -1(1) -1(1) 4(1)

C(8) 31(1) 21(1) 23(1) 3(1) -5(1) 1(1)

C(9) 24(1) 24(1) 20(1) 2(1) 1(1) -3(1)

C(10) 21(1) 38(1) 40(1) 5(1) 5(1) 0(1)

C(11) 41(1) 30(1) 25(1) 0(1) 9(1) 4(1)

C(12) 43(1) 44(1) 26(1) -5(1) 1(1) 5(1)

C(13) 32(1) 41(1) 51(1) -14(1) 15(1) 2(1)

C(14) 21(1) 27(1) 40(1) 2(1) 2(1) -2(1)

C(15) 41(1) 49(1) 35(1) 10(1) -15(1) -11(1)

C(16) 25(1) 20(1) 38(1) 8(1) 0(1) 2(1)

C(17) 26(1) 35(1) 26(1) 10(1) 2(1) 1(1)

C(18) 22(1) 28(1) 20(1) 1(1) -2(1) 0(1)

C(19) 15(1) 21(1) 23(1) 1(1) -1(1) 2(1)

C(20) 18(1) 23(1) 21(1) -2(1) 2(1) -2(1)

C(21) 20(1) 19(1) 20(1) -4(1) 3(1) 0(1)

C(22) 27(1) 21(1) 23(1) -1(1) 6(1) -2(1)

C(23) 33(1) 22(1) 20(1) 2(1) 1(1) 3(1)

C(24) 25(1) 23(1) 24(1) -1(1) -4(1) 2(1)

C(25) 27(1) 31(1) 26(1) -2(1) -2(1) -10(1)

C(26) 22(1) 39(1) 27(1) 1(1) 6(1) 7(1)

C(27) 30(1) 37(1) 47(1) 5(1) 11(1) 14(1)

C(28) 41(1) 38(1) 34(1) -10(1) 13(1) -3(1)

C(29) 21(1) 41(1) 38(1) 8(1) -5(1) -7(1)

C(30) 36(1) 29(1) 33(1) -6(1) -4(1) -3(1)

Table 5. Hydrogen coordinates ( x 104) and isotropic displacement parameters (Å2x 10 3)

for tipmea.

________________________________________________________________________________

x y z U(eq)

________________________________________________________________________________

H(1A) -504 4334 1691 33

H(2A) 538 4739 2617 33

H(3A) -649 6438 2961 30

H(7A) -3334 9440 1613 29

H(8A) -1612 10206 1035 30

H(9A) 235 8925 1085 27

H(10A) -3969 6731 1647 49

H(10B) -4509 7720 1975 49

H(10C) -4273 6571 2254 49

H(11A) -1658 8179 2827 48

H(11B) -2872 7459 2973 48

H(11C) -3104 8605 2690 48

H(12A) 405 6433 404 56

H(12B) -686 6019 777 56

H(12C) 423 5210 607 56

H(13A) 2570 5340 1019 61

H(13B) 2943 6330 1405 61

H(13C) 2663 6536 784 61

H(14A) 2176 8686 2259 44

H(14B) 1955 8183 1677 44

H(14C) 3253 7913 2033 44

H(15A) 3186 6749 2770 63

H(15B) 1841 6237 2927 63

H(15C) 2119 7498 3019 63

H(16A) 3799 4889 56 33

H(17A) 3861 3636 -744 35

H(18A) 2555 1905 -524 28

H(22A) 1791 254 1435 28

H(23A) 4050 -11 1887 30

H(24A) 5556 1173 1429 29

H(25A) 1530 641 35 42

H(25B) 286 1414 -2 42

H(25C) 476 558 470 42

H(26A) 1181 3080 1118 43

H(26B) 256 2043 1125 43

H(26C) 77 2902 653 43

H(27A) 6341 390 185 56

H(27B) 6580 1356 601 56

H(27C) 7424 1283 93 56

H(28A) 6407 1607 -772 56

H(28B) 4907 1936 -837 56

H(28C) 5313 732 -666 56

H(29A) 7531 4321 760 50

H(29B) 7522 3234 418 50

H(29C) 7758 3180 1049 50

H(30A) 5895 3697 1589 49

H(30B) 4537 3973 1278 49

H(30C) 5737 4785 1249 49

________________________________________________________________________________

Structure TIDPCL. Ti[**L1**]2


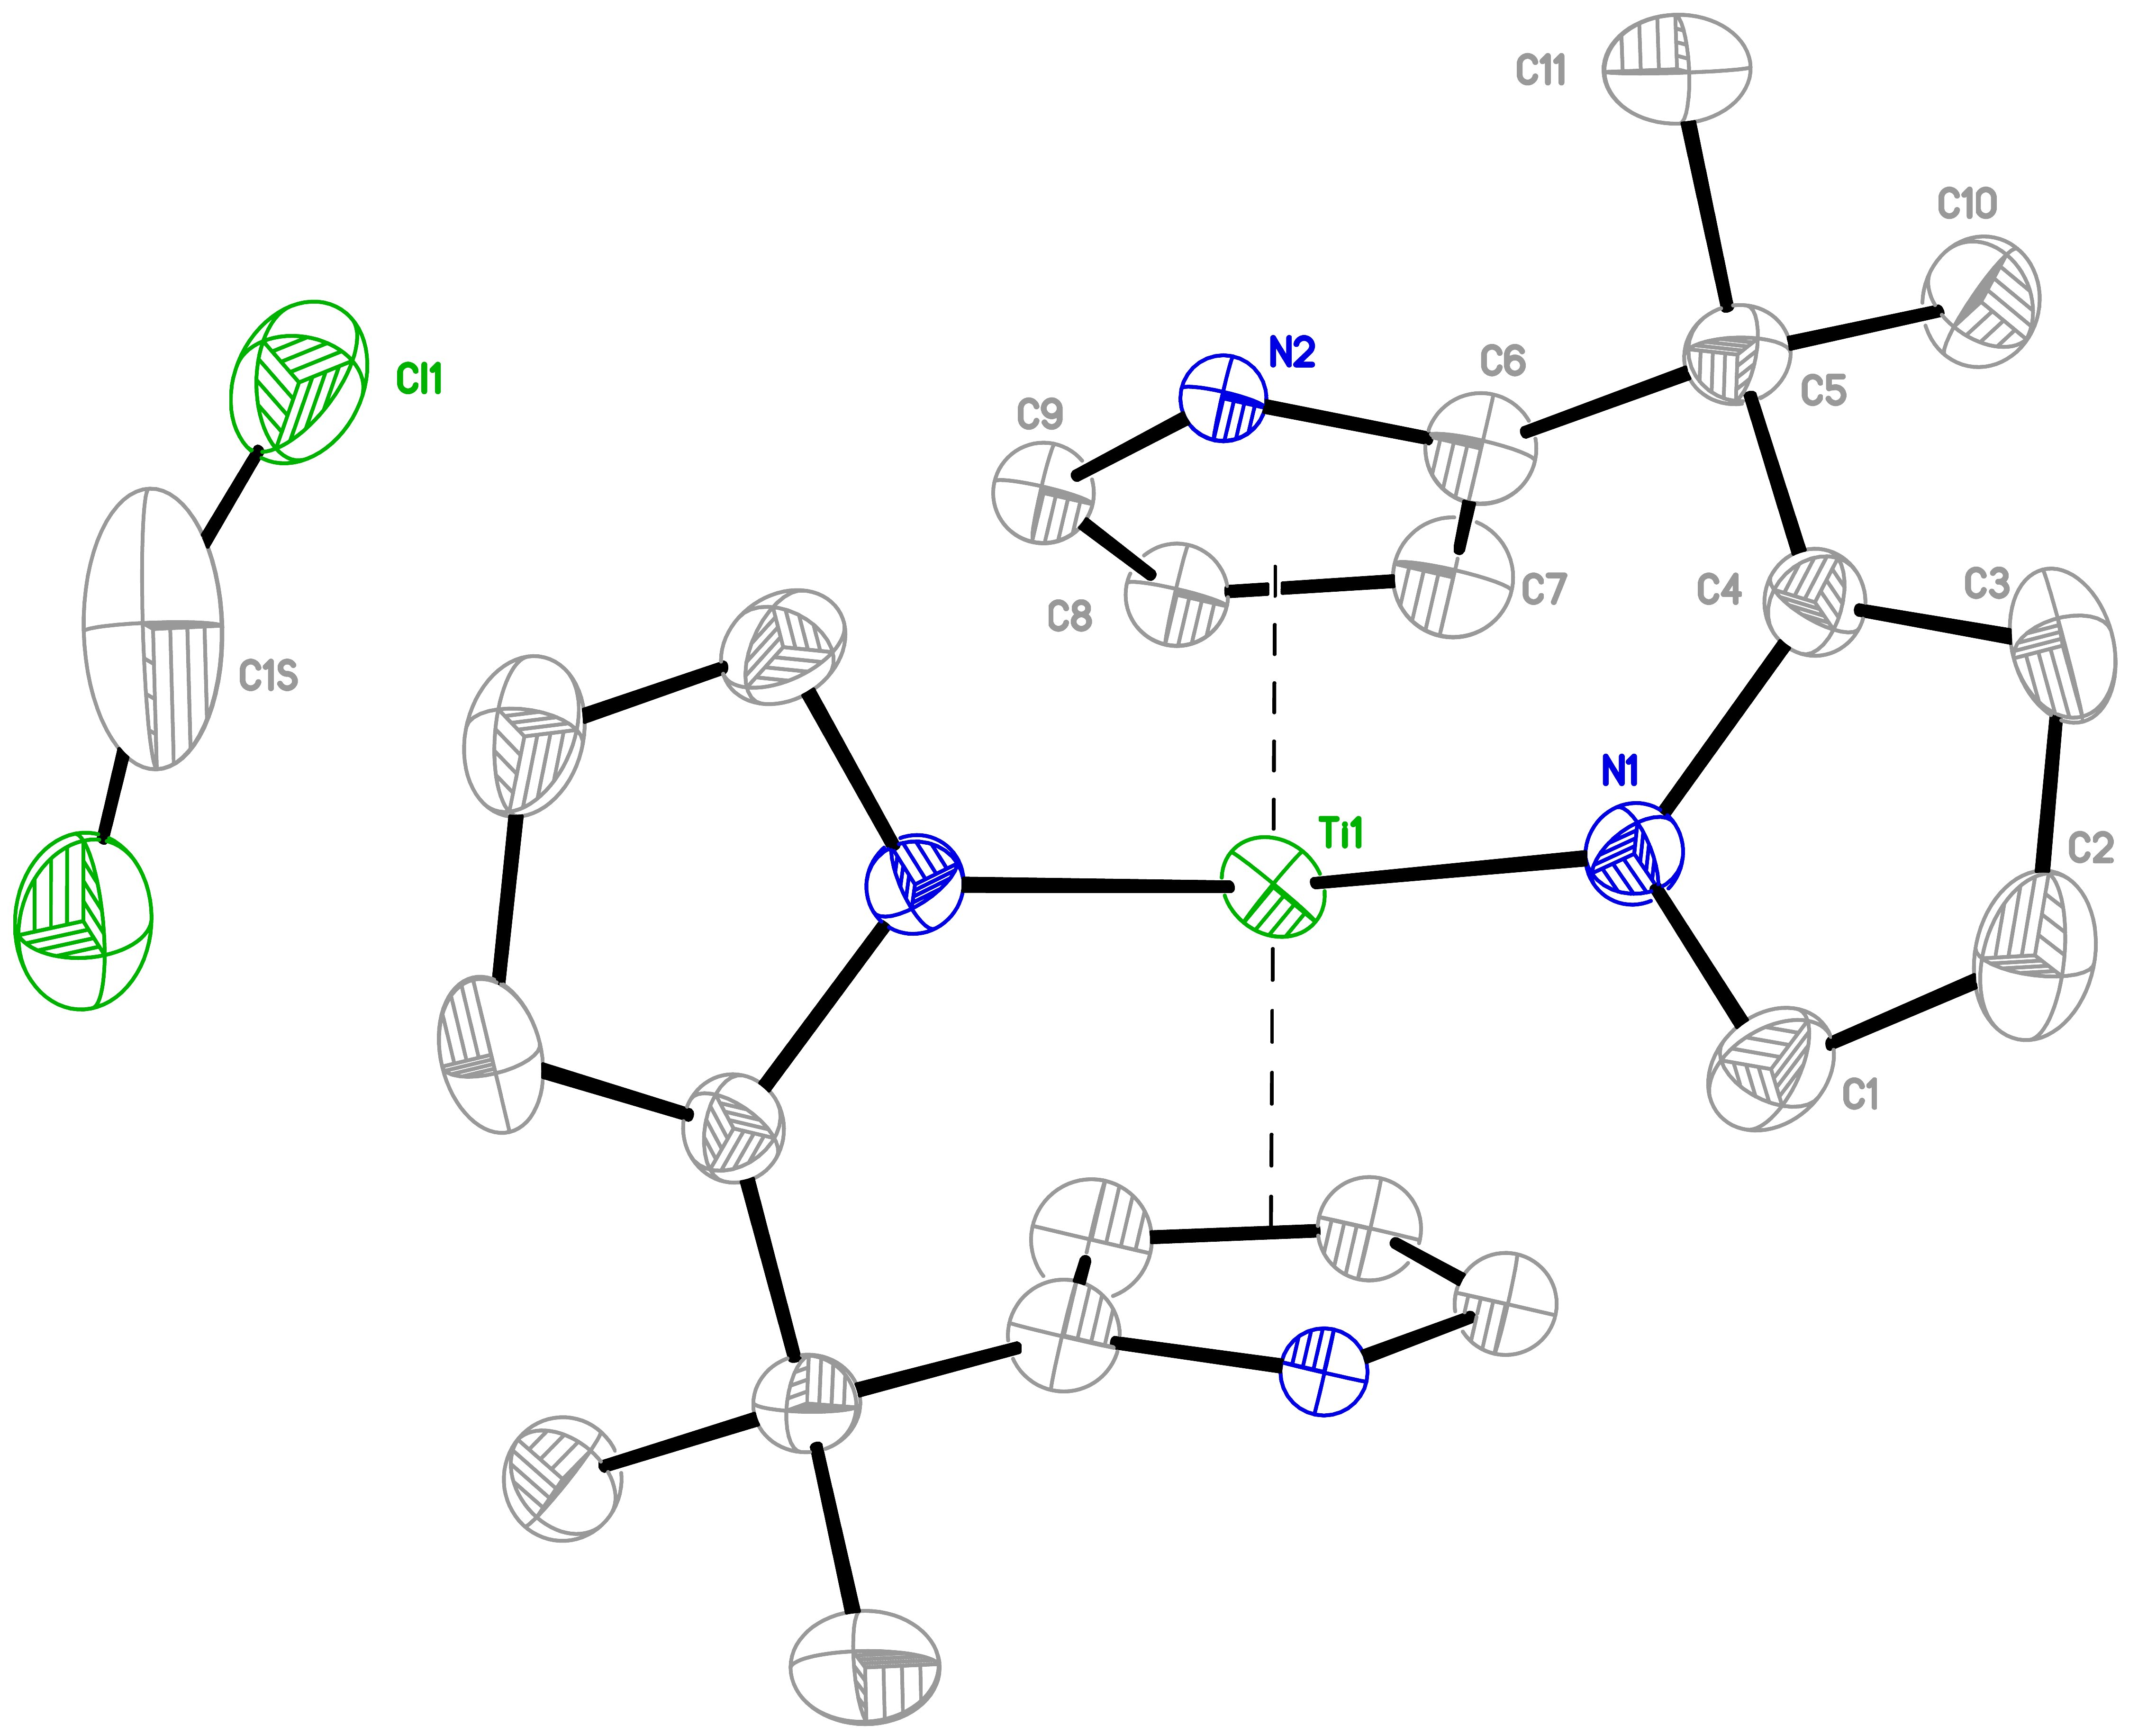


Table 1. Crystal data and structure refinement for tidpcl.

Identification code tidpcl

Empirical formula C23 H26 Cl2 N4 Ti

Formula weight 477.28

Temperature 150(2) K

Wavelength 0.71073 Å

Crystal system Orthorhombic

Space group P2(1)2(1)2

Unit cell dimensions a = 11.107(2) Å = 90°.

b = 14.926(2) Å = 90°.

c = 6.7163(10) Å  = 90°.

Volume 1113.4(5) Å3

Z 2

Density (calculated) 1.424 Mg/m3

Absorption coefficient 0.642 mm-1

F(000) 496

Crystal size 0.37 x 0.10 x 0.08 mm3

Theta range for data collection 2.29 to 28.63°.

Index ranges -14<=h<=9, -12<=k<=19, -8<=l<=8

Reflections collected 4543

Independent reflections 2522 [R(int) = 0.036]

Completeness to theta = 27.50° 98.7 %

Absorption correction Semi-empirical from equivalents

Max. and min. transmission 0.949 and 0.887

Refinement method Full-matrix least-squares on F2

Data / restraints / parameters 2506 / 4 / 128

Goodness-of-fit on F2 0.913

Final R indices [I>2sigma(I)] R1 = 0.0480, wR2 = 0.0921

R indices (all data) R1 = 0.0795, wR2 = 0.1009

Absolute structure parameter -0.02(5)

Largest diff. peak and hole 0.437 and -0.324 e.Å-3

Table 2. Atomic coordinates ( x 104) and equivalent isotropic displacement parameters (Å2x 103)

for tidpcl. U(eq) is defined as one third of the trace of the orthogonalized Uij tensor.

________________________________________________________________________________

x y z U(eq)

________________________________________________________________________________

Ti(1) 0 0 7423(1) 24(1)

N(1) -1419(2) -293(2) 9237(4) 23(1)

C(1) -2100(3) 280(2) 10410(5) 32(1)

C(2) -2936(3) -182(2) 11452(5) 38(1)

C(3) -2815(3) -1100(2) 10939(5) 36(1)

C(4) -1894(3) -1145(2) 9585(5) 24(1)

C(5) -1397(3) -1922(2) 8413(5) 30(1)

C(6) -443(3) -1546(2) 7063(5) 30(1)

N(2) 674(4) -1461(4) 7950(9) 18(2)

C(7) -458(7) -1228(6) 5101(9) 39(3)

C(8) 755(7) -977(5) 4775(13) 29(2)

C(9) 1389(6) -1122(4) 6468(10) 26(2)

N(2') 755(4) -1399(5) 7349(13) 33(3)

C(7') -717(9) -1141(7) 5220(11) 41(4)

C(8') 336(8) -766(5) 4373(13) 35(2)

C(9') 1223(8) -954(5) 5756(15) 29(2)

C(10) -2402(3) -2359(2) 7177(6) 41(1)

C(11) -863(4) -2618(2) 9841(6) 48(1)

C(1S) 5000 0 7291(8) 91(2)

Cl(1) 4814(1) -964(1) 5812(2) 65(1)

________________________________________________________________________________

Table 3. Bond lengths [Å] and angles [°] for tidpcl.

Ti(1)-N(1)#1 2.040(3)

Ti(1)-N(1) 2.040(3)

Ti(1)-N(2')#1 2.251(8)

Ti(1)-N(2') 2.251(8)

Ti(1)-C(9')#1 2.264(8)

Ti(1)-C(9') 2.264(8)

Ti(1)-N(2)#1 2.333(6)

Ti(1)-N(2) 2.333(6)

Ti(1)-C(9)#1 2.366(7)

Ti(1)-C(9) 2.366(7)

Ti(1)-C(6) 2.371(3)

Ti(1)-C(6)#1 2.371(3)

N(1)-C(1) 1.387(4)

N(1)-C(4) 1.397(4)

C(1)-C(2) 1.352(5)

C(2)-C(3) 1.418(4)

C(3)-C(4) 1.370(5)

C(4)-C(5) 1.506(4)

C(5)-C(6) 1.504(5)

C(5)-C(11) 1.533(5)

C(5)-C(10) 1.536(5)

C(6)-N(2') 1.363(5)

C(6)-N(2) 1.382(4)

C(6)-C(7) 1.400(6)

C(6)-C(7') 1.411(6)

N(2)-C(9) 1.371(7)

C(7)-C(8) 1.415(7)

C(8)-C(9) 1.355(11)

N(2')-C(9') 1.363(7)

C(7')-C(8') 1.416(8)

C(8')-C(9') 1.382(13)

C(1S)-Cl(1) 1.761(3)

C(1S)-Cl(1)#2 1.761(3)

N(1)#1-Ti(1)-N(1) 106.63(15)

N(1)#1-Ti(1)-N(2')#1 95.87(18)

N(1)-Ti(1)-N(2')#1 85.65(16)

N(1)#1-Ti(1)-N(2') 85.65(16)

N(1)-Ti(1)-N(2') 95.87(18)

N(2')#1-Ti(1)-N(2') 177.5(4)

N(1)#1-Ti(1)-C(9')#1 128.63(19)

N(1)-Ti(1)-C(9')#1 88.1(3)

N(2')#1-Ti(1)-C(9')#1 35.1(2)

N(2')-Ti(1)-C(9')#1 142.7(3)

N(1)#1-Ti(1)-C(9') 88.1(3)

N(1)-Ti(1)-C(9') 128.63(19)

N(2')#1-Ti(1)-C(9') 142.7(3)

N(2')-Ti(1)-C(9') 35.1(2)

C(9')#1-Ti(1)-C(9') 120.7(6)

N(1)#1-Ti(1)-N(2)#1 87.52(16)

N(1)-Ti(1)-N(2)#1 82.07(12)

N(2')#1-Ti(1)-N(2)#1 10.4(2)

N(2')-Ti(1)-N(2)#1 172.0(3)

C(9')#1-Ti(1)-N(2)#1 45.1(3)

C(9')-Ti(1)-N(2)#1 148.8(2)

N(1)#1-Ti(1)-N(2) 82.07(12)

N(1)-Ti(1)-N(2) 87.52(16)

N(2')#1-Ti(1)-N(2) 172.0(3)

N(2')-Ti(1)-N(2) 10.4(2)

C(9')#1-Ti(1)-N(2) 148.8(2)

C(9')-Ti(1)-N(2) 45.1(3)

N(2)#1-Ti(1)-N(2) 162.5(3)

N(1)#1-Ti(1)-C(9)#1 120.94(17)

N(1)-Ti(1)-C(9)#1 79.03(19)

N(2')#1-Ti(1)-C(9)#1 25.1(2)

N(2')-Ti(1)-C(9)#1 153.4(2)

C(9')#1-Ti(1)-C(9)#1 13.9(2)

C(9')-Ti(1)-C(9)#1 134.6(4)

N(2)#1-Ti(1)-C(9)#1 33.91(18)

N(2)-Ti(1)-C(9)#1 155.80(16)

N(1)#1-Ti(1)-C(9) 79.03(19)

N(1)-Ti(1)-C(9) 120.94(17)

N(2')#1-Ti(1)-C(9) 153.4(2)

N(2')-Ti(1)-C(9) 25.1(2)

C(9')#1-Ti(1)-C(9) 134.6(4)

C(9')-Ti(1)-C(9) 13.9(2)

N(2)#1-Ti(1)-C(9) 155.80(16)

N(2)-Ti(1)-C(9) 33.91(18)

C(9)#1-Ti(1)-C(9) 148.5(4)

N(1)#1-Ti(1)-C(6) 115.47(11)

N(1)-Ti(1)-C(6) 72.06(11)

N(2')#1-Ti(1)-C(6) 145.37(13)

N(2')-Ti(1)-C(6) 34.17(13)

C(9')#1-Ti(1)-C(6) 115.89(19)

C(9')-Ti(1)-C(6) 57.5(2)

N(2)#1-Ti(1)-C(6) 149.15(13)

N(2)-Ti(1)-C(6) 34.16(11)

C(9)#1-Ti(1)-C(6) 121.71(17)

C(9)-Ti(1)-C(6) 54.48(17)

N(1)#1-Ti(1)-C(6)#1 72.06(11)

N(1)-Ti(1)-C(6)#1 115.47(11)

N(2')#1-Ti(1)-C(6)#1 34.17(13)

N(2')-Ti(1)-C(6)#1 145.37(13)

C(9')#1-Ti(1)-C(6)#1 57.5(2)

C(9')-Ti(1)-C(6)#1 115.89(19)

N(2)#1-Ti(1)-C(6)#1 34.16(11)

N(2)-Ti(1)-C(6)#1 149.15(13)

C(9)#1-Ti(1)-C(6)#1 54.48(17)

C(9)-Ti(1)-C(6)#1 121.71(17)

C(6)-Ti(1)-C(6)#1 168.28(18)

C(1)-N(1)-C(4) 105.1(3)

C(1)-N(1)-Ti(1) 128.9(2)

C(4)-N(1)-Ti(1) 126.0(2)

C(2)-C(1)-N(1) 110.7(3)

C(1)-C(2)-C(3) 107.6(3)

C(4)-C(3)-C(2) 106.2(3)

C(3)-C(4)-N(1) 110.3(3)

C(3)-C(4)-C(5) 131.2(3)

N(1)-C(4)-C(5) 118.4(3)

C(6)-C(5)-C(4) 106.6(3)

C(6)-C(5)-C(11) 110.9(3)

C(4)-C(5)-C(11) 109.6(3)

C(6)-C(5)-C(10) 110.2(3)

C(4)-C(5)-C(10) 110.1(3)

C(11)-C(5)-C(10) 109.3(3)

N(2)-C(6)-C(7) 112.7(5)

N(2')-C(6)-C(7') 105.4(6)

N(2')-C(6)-C(5) 131.6(5)

N(2)-C(6)-C(5) 114.0(4)

C(7)-C(6)-C(5) 133.3(4)

N(2')-C(6)-Ti(1) 68.1(4)

N(2)-C(6)-Ti(1) 71.4(3)

C(7)-C(6)-Ti(1) 76.7(4)

C(7')-C(6)-Ti(1) 73.6(5)

C(5)-C(6)-Ti(1) 116.6(2)

C(9)-N(2)-C(6) 103.9(5)

C(9)-N(2)-Ti(1) 74.4(4)

C(6)-N(2)-Ti(1) 74.4(3)

C(6)-C(7)-C(8) 102.9(6)

C(6)-C(7)-Ti(1) 69.7(4)

C(8)-C(7)-Ti(1) 72.8(5)

C(9)-C(8)-C(7) 108.8(6)

C(9)-C(8)-Ti(1) 70.3(4)

C(7)-C(8)-Ti(1) 73.7(5)

C(8)-C(9)-N(2) 111.5(6)

C(8)-C(9)-Ti(1) 77.0(4)

N(2)-C(9)-Ti(1) 71.7(4)

C(9')-N(2')-C(6) 109.9(7)

C(9')-N(2')-Ti(1) 73.0(5)

C(6)-N(2')-Ti(1) 77.7(4)

C(6)-C(7')-C(8') 110.1(7)

C(6)-C(7')-Ti(1) 72.0(4)

C(8')-C(7')-Ti(1) 72.1(5)

C(9')-C(8')-C(7') 103.8(7)

C(9')-C(8')-Ti(1) 68.3(5)

C(7')-C(8')-Ti(1) 73.4(6)

N(2')-C(9')-C(8') 110.8(7)

N(2')-C(9')-Ti(1) 71.9(5)

C(8')-C(9')-Ti(1) 77.1(5)

Cl(1)-C(1S)-Cl(1)#2 111.3(3)

___________________________________________

Symmetry transformations used to generate equivalent atoms:

#1 -x,-y,z #2 -x+1,-y,z

Table 4. Anisotropic displacement parameters (Å2x 103) for tidpcl. The anisotropic

displacement factor exponent takes the form: -22[ h2 a*2U11 + ... + 2 h k a* b* U12 ]

______________________________________________________________________________

U11 U22 U33 U23 U13 U12

______________________________________________________________________________

Ti(1) 27(1) 22(1) 23(1) 0 0 -3(1)

N(1) 21(1) 22(1) 26(2) -4(1) 1(1) 0(1)

C(1) 29(2) 33(2) 34(2) -13(2) -2(2) 6(2)

C(2) 28(2) 54(3) 31(2) -13(2) 4(2) -2(2)

C(3) 26(2) 44(2) 37(2) 6(2) -1(2) -12(2)

C(4) 22(2) 25(2) 26(2) 2(1) -3(2) -1(2)

C(5) 25(2) 22(2) 42(2) -3(2) -4(2) 1(2)

C(10) 32(2) 35(2) 57(3) -18(2) -6(2) -3(2)

C(11) 45(3) 29(2) 69(3) 10(2) -4(2) 4(2)

C(1S) 59(4) 187(8) 29(3) 0 0 -38(5)

Cl(1) 47(1) 81(1) 68(1) 30(1) -6(1) 1(1)

______________________________________________________________________________

Table 5. Hydrogen coordinates ( x 104) and isotropic displacement parameters (Å2x 10 3)

for tidpcl.

________________________________________________________________________________

x y z U(eq)

________________________________________________________________________________

H(1A) -1993 911 10473 38

H(2A) -3501 63 12362 45

H(3A) -3279 -1585 11436 43

H(7A) -1126 -1265 4106 47

H(8A) 1100 -771 3478 35

H(9A) 2283 -1057 6573 31

H(7'A) -1529 -1145 4574 49

H(8'A) 436 -502 3015 42

H(9'A) 2103 -852 5532 34

H(10A) -2741 -1917 6257 62

H(10B) -3036 -2578 8068 62

H(10C) -2069 -2862 6417 62

H(11A) -217 -2342 10622 72

H(11B) -538 -3121 9074 72

H(11C) -1494 -2835 10740 72

H(1S1) 5714 -76 8158 110

H(1S2) 4286 76 8158 110
